# Supplementary material for: Drosophila caspase activity is required independently of apoptosis to produce active TNF/Eiger during nociceptive sensitization
Source: PubMed Central journal article supplement (PMC5520682; doi:10.1038/cddis.2016.474), 2017-05-11

## Supplementary Information

### Fly Strains and Genetics

Fly stocks were maintained at 25°C and early third instar larvae were selected for UV treatment 4~5 days after copulation. *w<sup>1118</sup>* was used as a control strain.<sup>1</sup> Null or hypomorphic alleles were used for behavioral tests: *egr<sup>1</sup>* and *egr<sup>3</sup>* served to inhibit TNF signaling.<sup>2</sup> *Dronc<sup>I29</sup>*, *Dark<sup>G8</sup>*, *Dark<sup>S7</sup>*, *Dark<sup>H16</sup>*, *Drice<sup>17</sup>*, *Drice<sup>A1</sup>*, *Dcp-1<sup>prev</sup>*, *hid<sup>1</sup>*, *skl<sup>e1</sup>*, *skl<sup>e3</sup>*, *Dredd<sup>EP14</sup>*, *Strica<sup>4</sup>*, *Damm<sup>f02209</sup>*, *Decay<sup>AK2</sup>*, *Decay<sup>AS3</sup>* were used to inhibit cell death signaling pathway.<sup>3, 4, 5, 6, 7, 8, 9, 10, 11, 12</sup> *Traf6<sup>Ex1</sup>*, *p38a<sup>1</sup>*, *dl<sup>1</sup>*, *Rel<sup>E20</sup>* and *Dif<sup>d</sup>* were used to inhibit TNFR downstream.<sup>13, 14, 15, 16, 17</sup> *ppk-CD4-tdTom* was used to label nociceptive sensory neurons.<sup>18</sup> The Gal4/UAS system was employed to overexpress/knockdown transgenes in tissue specific manner. Gal4 drivers used: *A58 Gal4<sup>19</sup>* and *e22C Gal4<sup>20</sup>*, *ppk1.9 Gal4<sup>21</sup>*, *hmlΔ Gal4<sup>22</sup>*, and *Gal4<sup>OK376</sup>* (ref. 23). UAS-transgenes used: *UAS-regg<sup>1</sup>* (full-length TNF)<sup>2</sup>, *UAS-eiger60* (soluble TNF)<sup>24</sup>, *UAS-Dronc<sup>25</sup>*, *UAS-hid<sup>26</sup>*, *UAS-grim<sup>27</sup>*, and *UAS-reaper<sup>28</sup>*, *UAS-DIAP1<sup>26</sup>*, *UAS-p35<sup>29</sup>*, *UAS-ptcDN<sup>30</sup>*, *UAS-DTKR-GFP<sup>31</sup>*, UAS-eGFP (Bloomington), *UAS-miRHG*.<sup>32</sup> *UAS-DroncRNAi (8091R1)* (NIG), *UAS-EigerRNAi<sup>2</sup>*, *UAS-WengenRNAi*.<sup>33</sup> *UAS-RNAi* lines from Vienna *Drosophila* Research Center (VDRC)<sup>34</sup>: 21830 (grim), 12045 (reaper), 8269 (hid), 34836 (traf3), 16125 (traf6), 52277 (p38), 45998 (dorsal), 107072 (E(z)). *JF02826* (E(z)) and *UAS-GFPRNAi* (9930) were from Bloomington stock center. The precise genotypes for each figure panel in this study are listed in Supplemental information.

### Microarray methodology

The isolation and purification of nociceptive sensory neurons from third instar larvae was performed as previously described.<sup>35</sup> Briefly, control larvae (*ppk1.9-GAL4,UAS-mCD8::GFP*) and larvae which overexpress TNF/Eiger (*ppk1.9-GAL4,UAS-mCD8::GFP; UAS-regg<sup>l</sup>*) were used to isolate wild-type and genetically sensitized nociceptive sensory neurons via magnetic bead cell sorting. Isolated nociceptive neurons were then prepared for microarray gene expression analyses as previously described.<sup>36</sup> mRNA isolation, amplification, labeling, hybridization, and microarray analyses were performed by Miltenyi Biotec. 250 ng of each of the sample cDNAs were used as template for Cy3 (control) and Cy5 (TNF/Eiger overexpression) labeling. Labeled cDNAs were combined and hybridized to an Agilent whole *Drosophila* genome oligo microarray (4x44K V2) and analyses were conducted in quadruplicate. Microarray expression and bioinformatics analyses were performed as previously described.<sup>36, 37</sup> Normalized Cy5/Cy3 fold changes (Cy5/Cy3-log10 ratios) were used to investigate differentially expressed genes with a threshold fold change >2 (mean fold change of genes across four replicate arrays) and a p-value <0.01 for genes that are up-regulated in TNF signaling-activated sensory nociceptive neurons relative to controls.

## **Supplementary Figure legends**

**Supplementary Figure 1** Pro-apoptotic genes and other caspases are not required for both epidermal apoptosis and thermal allodynia by UV irradiation. **(a and b)** Larval epidermal staining of indicated genotypes. **(a)** Grim and Reaper overexpression in the larval epidermis does not induce apoptosis. **(b)** Localized and temporally-controlled expression of UAS-Hid via Pannier-Gal4 can induce apoptosis. Anti-Fasciclin-3 antibody

(membranes, green) and anti-activated Caspase3 labeling (apoptotic cells, red) were used. (c) Larval epidermal staining 24 h after UV irradiation. Anti-Fasciclin-3 antibody (membranes, green) and TUNEL labeling (apoptotic cells, red) were used. (d and e) Measurement of UV-induced thermal allodynia at 38 °C, 24 h post UV irradiation. Genotypes are indicated. n = 3 sets of 30 larvae. Error bars represent SEM.

**Supplementary Figure 2** Baseline thermal nociception analysis for genotypes relevant to Figure 1 and UAS-only controls for Figure 1D. (a-d) Measurement of aversive withdrawal behavior of indicated genotypes at 45°C (a and b) or 48°C (c and d) in the absence of tissue damage. (e) UV-induced thermal allodynia of indicated *UAS-transgene* alone control at 38 °C.

n = 3 sets of 30 larvae. Error bars represent SEM.

**Supplementary Figure 3** Baseline thermal nociception analysis for genotypes relevant to Figure 3. (a-d) Measurement of aversive withdrawal behavior of indicated genotypes at 45°C (a and c) or 48°C (b and d) in the absence of tissue damage.

n = 3 sets of 30 larvae. Error bars represent SEM.

**Supplementary Figure 4** Expression of *UAS-Dronc<sup>RNAi</sup>* does not inhibit thermal allodynia induced by hyperactivation of Hedgehog or Tachykinin signaling. UV-induced thermal allodynia of indicated genotypes alone control at 38 °C. n = 3 sets of 30 larvae. Error bars represent SEM.

**Supplementary Figure 5** Non-heat-shocked larvae of the genotypes relevant to Figure 4 do not show thermal allodynia. Measurement of aversive withdrawal behavior at 38 °C when larvae of the indicated genotypes were maintained at the non-permissive (no heat shock) temperature (18°C). n = 3 sets of 30 larvae. Error bars represent SEM.

**Supplementary Figure 6** A TNF/Eiger transcriptional reporter is not induced by UV irradiation. Epidermal whole mounts in larvae bearing *UAS-GFP* under control of *TNF/Eiger-Gal4* after UV irradiation (Anti-GFP, green).

**Supplementary Figure 7** Baseline thermal nociception of larvae expressing *UAS-E(z)<sup>RNAi</sup>* in nociceptive sensory neurons. **(a and b)** Measurement of aversive withdrawal behavior of larvae of the indicated genotypes at 45 °C **(a)** or 48 °C **(b)**. n = 3 sets of 30 larvae. Error bars represent SEM. **(c)** Dendritic morphology of nociceptive sensory neurons in larvae indicated genotype.

## Genotypes of flies used in this study

### Figure 1b

*w<sup>1118</sup>*;  
*w<sup>1118</sup>*;  
*w<sup>1118</sup>*;; *dronc<sup>I29</sup>*  
*w<sup>1118</sup>*;; *dark<sup>G8</sup>/dark<sup>H16</sup>*  
*w<sup>1118</sup>*;; *drice<sup>A1</sup>*  
*w<sup>1118</sup>*;; *dcp-1<sup>prev</sup>*  
*w<sup>1118</sup>*;; *e22C Gal4/+*  
*w<sup>1118</sup>*;; *e22C Gal4/UAS-DIAP1.H*  
*w<sup>1118</sup>*;; *e22C Gal4/UAS-p35*

### Figure 1c

*w<sup>1118</sup>*;  
*w<sup>1118</sup>*;; *dronc<sup>I29</sup>*

*w*<sup>1118</sup>; *dark*<sup>G8</sup>/*dark*<sup>H16</sup>  
*w*<sup>1118</sup>; *dark*<sup>G8</sup>/*dark*<sup>S7</sup>  
*w*<sup>1118</sup>; *dark*<sup>S7</sup>/*dark*<sup>H16</sup>  
*w*<sup>1118</sup>; ; *drice*<sup>Δ1</sup>  
*w*<sup>1118</sup>; ; *dcp-1*<sup>prev</sup>  
*w*<sup>1118</sup>; ; *dcp-1*<sup>prev</sup>; *drice*<sup>Δ1</sup>  
*w*<sup>1118</sup>; ; *eiger*<sup>1</sup>/+  
*w*<sup>1118</sup>; ; *eiger*<sup>3</sup>/+  
*w*<sup>1118</sup>; ; *eiger*<sup>1</sup>/*eiger*<sup>3</sup>

### Figure 1d, S2a, and S2c

*w*<sup>1118</sup>; ; *A58 Gal4*/+  
*w*<sup>1118</sup>; ; *UAS-DIAP1.H*/+; *A58 Gal4*/+  
*w*<sup>1118</sup>; ; *UAS-Dronc*<sup>RNAi</sup> (*8081R1*)/+; *A58 Gal4*/+  
*w*<sup>1118</sup>; ; *e22C Gal4*/+  
*w*<sup>1118</sup>; ; *e22C Gal4/UAS-p35*  
*w*<sup>1118</sup>; ; *e22C Gal4/UAS-Dronc*<sup>RNAi</sup> (*8081R1*)

### Figure 2a and 2b

*w*<sup>1118</sup>;

### Figure 2c

*w*<sup>1118</sup>; ; *A58 Gal4*/+  
*w*<sup>1118</sup>; ; *UAS-Dronc*<sup>RNAi</sup> (*8081R1*)/+; *A58 Gal4*/+  
*w*<sup>1118</sup>; ; *UAS-Eiger*<sup>RNAi</sup> /+; *A58 Gal4*/+  
*w*<sup>1118</sup>; ; *A58 Gal4*/+  
*w*<sup>1118</sup>; ; *UAS-Dronc*<sup>RNAi</sup> (*8081R1*)/+; *A58 Gal4*/+  
*w*<sup>1118</sup>; ; *UAS-Eiger*<sup>RNAi</sup> /+; *A58 Gal4*/+

### Figure 3a, S3a, and S3b

*w*<sup>1118</sup>; ; *ppk1.9 Gal4*/+  
*w*<sup>1118</sup>; ; *ppk1.9 Gal4/UAS-Traf3*<sup>RNAi</sup> (*v34836*)  
*w*<sup>1118</sup>; ; *UAS-Traf6*<sup>RNAi</sup> (*v16125*)/+; *ppk1.9 Gal4*/+  
*w*<sup>1118</sup>; ; *ppk1.9 Gal4/UAS-p38a*<sup>RNAi</sup> (*v52277*)  
*w*<sup>1118</sup>; ; *ppk1.9 Gal4/UAS-dl*<sup>RNAi</sup> (*v45998*)  
*w*<sup>1118</sup>; ; *UAS-Dronc*<sup>RNAi</sup> (*8081R1*)/+; *ppk1.9 Gal4*/+

### Figure 3b

*w*<sup>1118</sup>;  
*w*<sup>1118</sup>; ; *traf6*<sup>EX1</sup>;  
*w*<sup>1118</sup>; ; *p38a*<sup>1</sup>  
*w*<sup>1118</sup>; ; *dl*<sup>1</sup>  
*w*<sup>1118</sup>; ; *relish*<sup>E20</sup>  
*w*<sup>1118</sup>; ; *Dif*<sup>d</sup>

### Figure 3c

*w<sup>1118</sup>; regg<sup>1</sup>/+; ppk1.9 Gal4/+*  
*w<sup>1118</sup>; regg<sup>1</sup>/UAS-Wengen<sup>RNAi</sup>/+; ppk1.9 Gal4/+*  
*w<sup>1118</sup>; regg<sup>1</sup>/+;; ppk1.9 Gal4/ UAS-Traf3<sup>RNAi</sup> (v34836)*  
*w<sup>1118</sup>; regg<sup>1</sup>/UAS-Traf6<sup>RNAi</sup> (v16125)/+; ppk1.9 Gal4/+*  
*w<sup>1118</sup>; regg<sup>1</sup>/+;; ppk1.9 Gal4/UAS-p38a<sup>RNAi</sup> (v52277)*  
*w<sup>1118</sup>; regg<sup>1</sup>/+;; ppk1.9 Gal4/UAS-Dorsal<sup>RNAi</sup> (v45998)*  
*w<sup>1118</sup>; regg<sup>1</sup>/UAS-Dronc<sup>RNAi</sup> (8081R1)/+; ppk1.9 Gal4/+*

#### Figure 4b

*w<sup>1118</sup>; tubGal80<sup>ts</sup>/+; A58 Gal4/+*  
*w<sup>1118</sup>; tubGal80<sup>ts</sup>/+; A58 Gal4/UAS-Dronc*  
*w<sup>1118</sup>; tubGal80<sup>ts</sup>/regg<sup>1</sup>; A58 Gal4/+*  
*w<sup>1118</sup>; tubGal80<sup>ts</sup>/UAS-Eiger 60; A58 Gal4/+*

#### Figure 4c and S5a

*w<sup>1118</sup>; tubGal80<sup>ts</sup>/+; A58 Gal4/+*  
*w<sup>1118</sup>; tubGal80<sup>ts</sup>/+; A58 Gal4/UAS-Dronc*  
*w<sup>1118</sup>; tubGal80<sup>ts</sup>/UAS-Eiger<sup>RNAi</sup>; A58 Gal4/UAS-Dronc*  
*w<sup>1118</sup>; tubGal80<sup>ts</sup>/UAS-p35; A58 Gal4/UAS-Dronc*  
*w<sup>1118</sup>; tubGal80<sup>ts</sup>/UAS-Eiger<sup>RNAi</sup>; A58 Gal4/+*  
*w<sup>1118</sup>; tubGal80<sup>ts</sup>/UAS-p35; A58 Gal4/+*

#### Figure 4d and S5b

*w<sup>1118</sup>; tubGal80<sup>ts</sup>/+; A58 Gal4/+*  
*w<sup>1118</sup>; tubGal80<sup>ts</sup>/regg<sup>1</sup>; A58 Gal4/+*  
*w<sup>1118</sup>; tubGal80<sup>ts</sup>/regg<sup>1</sup>, UAS-Dronc<sup>RNAi</sup> (8081R1); A58 Gal4/+*  
*w<sup>1118</sup>; tubGal80<sup>ts</sup>/UAS-Eiger60; A58 Gal4/+*  
*w<sup>1118</sup>; tubGal80<sup>ts</sup>/UAS-Eiger60, UAS-Dronc<sup>RNAi</sup> (8081R1); A58 Gal4/+*

#### Figure 5c and 5d

*w<sup>1118</sup>;*

#### Figure 5e

*w<sup>1118</sup>; regg<sup>1</sup>/+; ppk1.9 Gal4/+*  
*w<sup>1118</sup>; hmlΔ Gal4/+*  
*w<sup>1118</sup>; hmlΔ Gal4/UAS-Eiger60*  
*w<sup>1118</sup>; hmlΔ Gal4/regg<sup>1</sup>*  
*w<sup>1118</sup>; Gal4<sup>OK376</sup>/+*  
*w<sup>1118</sup>; Gal4<sup>OK376</sup>/UAS-Eiger60*  
*w<sup>1118</sup>; Gal4<sup>OK376</sup>/regg<sup>1</sup>*

#### Figure 6c, S7a, and S7b

*w<sup>1118</sup>; UAS-GFP<sup>RNAi</sup> (9331); ppk1.9 Gal4/+*  
*w<sup>1118</sup>; UAS-E(z)<sup>RNAi</sup> (v107072); ppk1.9 Gal4/+*  
*w<sup>1118</sup>; UAS-E(z)<sup>RNAi</sup> (BL27993); ppk1.9 Gal4/+*

**Figure 6d**

$w^{1118}; UAS-GFP^{RNAi} (9331)/regg^1; ppk1.9 Gal4/+$   
 $w^{1118}; UAS-E(z)^{RNAi} (v107072)/regg^1; ppk1.9 Gal4/+$   
 $w^{1118}; UAS-E(z)^{RNAi} (BL27993)/regg^1; ppk1.9 Gal4/+$

**Figure S1a**

$w^{1118}; A58 Gal4/UAS-Grim$   
 $w^{1118}; UAS-Reaper/+; A58 Gal4/+$

**Figure S1b**

$w^{1118}; tubGal80^{ts}/+; pnr-Gal4, UAS-eGFP/+$   
 $w^{1118}; UAS-Hid/+; tubGal80^{ts}/+; pnr-Gal4, UAS-eGFP/+$

**Figure S1c**

$w^{1118}; dark^{G8}/dark^{S7}$   
 $w^{1118}; dark^{S7}/dark^{H16}$   
 $; hid^1$   
 $w^{1118}; sickle^1/sickle^3$   
 $w^{1118}; strica^4$   
 $w^{1118}; dredd^{EP1412};$   
 $w^{1118}; decay^{AK2}$   
 $w^{1118}; damm^{f02209}$

**Figure S1d**

$w^{1118}; A58 Gal4/+$   
 $w^{1118}; UAS-RHG^{miRNA}; A58 Gal4/+$   
 $w^{1118}; UAS-Grim^{RNAi} (v21830)/+; A58 Gal4/UAS-Reaper^{RNAi} (v12045), UAS-Hid^{RNAi} (v8269)$   
 $w^{1118}; UAS-DIAP1.H/+; A58 Gal4/+$   
 $w^{1118}; UAS-Dronc^{RNAi} (8081R1)/+; A58 Gal4/+$

**Figure S1e**

$w^{1118};$   
 $w^{1118}; dark^{G8}/dark^{S7}$   
 $w^{1118}; dark^{S7}/dark^{H16}$   
 $; hid^1$   
 $w^{1118}; sickle^1/sickle^3$   
 $w^{1118}; strica^4$   
 $w^{1118}; dredd^{EP1412};$   
 $w^{1118}; decay^{AK3}$   
 $w^{1118}; decay^{AK2}$   
 $w^{1118}; damm^{f02209}$

**Figure S2b and S2d**

$w^{1118};$   
 $w^{1118}; dronc^{129}$

$w^{1118};dark^{G8}/dark^{H16}$   
 $w^{1118};dark^{G8}/dark^{S7}$   
 $w^{1118};dark^{S7}/dark^{H16}$   
 $w^{1118};;drice^{17}$

### Figure S2e

$w^{1118};UAS-p35/+$   
 $w^{1118};UAS-DIAP1.H/+$   
 $w^{1118};UAS-Dronc^{RNAi}(8081R1)/+$

### Figure S3c and S3d

$w^{1118};$   
 $w^{1118};traf6^{EX1};$   
 $w^{1118};;p38a^1$   
 $w^{1118};dorsal^1$   
 $w^{1118};;relish^{E20}$

### Figure S3e

$w^{1118};;UAS-Traf3^{RNAi}(v34836)/+$   
 $w^{1118};UAS-Traf6^{RNAi}(v16125)/+$   
 $w^{1118};;UAS-p38a^{RNAi}(v52277)/+$   
 $w^{1118};;UAS-Dorsal^{RNAi}(v45998)/+$

### Figure S4

$w^{1118};UAS-Ptc^{DN}/+;ppk1.9 Gal4/+$   
 $w^{1118};UAS-Ptc^{DN}/UAS-Dronc^{RNAi}(8081R1);ppk1.9 Gal4/+$   
 $w^{1118};UAS-DTKR-GFP/+;ppk1.9 Gal4/+$   
 $w^{1118};UAS-DTKR-GFP/UAS-Dronc^{RNAi}(8081R1);ppk1.9 Gal4/+$

### Figure S6

$w^{1118};Eiger-Gal4/UAS-GFP$

### Figure S7c

$w^{1118};ppk-CD4TdTom/+;ppk1.9 Gal4/+$   
 $w^{1118};ppk-CD4TdTom/regg^1;ppk1.9 Gal4/+$   
 $w^{1118};ppk-CD4TdTom/UAS-E(z)^{RNAi}(BL27993);ppk1.9 Gal4/+$

## Supporting References

1. Rabinow L, Birchler JA. A dosage-sensitive modifier of retrotransposon-induced alleles of the *Drosophila* white locus. *The EMBO journal* 1989, **8**(3): 879-889.



2. Igaki T, Kanda H, Yamamoto-Goto Y, Kanuka H, Kuranaga E, Aigaki T, *et al.* Eiger, a TNF superfamily ligand that triggers the Drosophila JNK pathway. *The EMBO journal* 2002, **21**(12): 3009-3018.
3. Xu D, Li Y, Arcaro M, Lackey M, Bergmann A. The CARD-carrying caspase Dronc is essential for most, but not all, developmental cell death in Drosophila. *Development* 2005, **132**(9): 2125-2134.
4. Srivastava M, Scherr H, Lackey M, Xu D, Chen Z, Lu J, *et al.* ARK, the Apaf-1 related killer in Drosophila, requires diverse domains for its apoptotic activity. *Cell death and differentiation* 2007, **14**(1): 92-102.
5. Muro I, Berry DL, Huh JR, Chen CH, Huang H, Yoo SJ, *et al.* The Drosophila caspase Ice is important for many apoptotic cell deaths and for spermatid individualization, a nonapoptotic process. *Development* 2006, **133**(17): 3305-3315.
6. Laundrie B, Peterson JS, Baum JS, Chang JC, Fileppo D, Thompson SR, *et al.* Germline cell death is inhibited by P-element insertions disrupting the dcp-1/pita nested gene pair in Drosophila. *Genetics* 2003, **165**(4): 1881-1888.
7. Lindsley DL, Zimm GG, Lindsley DL. *The genome of Drosophila melanogaster*. Academic Press: San Diego, 1992.
8. Lee G, Sehgal R, Wang Z, Nair S, Kikuno K, Chen CH, *et al.* Essential role of grim-led programmed cell death for the establishment of corazonin-producing peptidergic nervous system during embryogenesis and metamorphosis in Drosophila melanogaster. *Biology open* 2013, **2**(3): 283-294.
9. Elrod-Erickson M, Mishra S, Schneider D. Interactions between the cellular and humoral immune responses in Drosophila. *Curr Biol* 2000, **10**(13): 781-784.
10. Baum JS, Arama E, Steller H, McCall K. The Drosophila caspases Strica and Dronc function redundantly in programmed cell death during oogenesis. *Cell death and differentiation* 2007, **14**(8): 1508-1517.
11. Kondo S, Senoo-Matsuda N, Hiromi Y, Miura M. DRONC coordinates cell death and compensatory proliferation. *Molecular and cellular biology* 2006, **26**(19): 7258-7268.
12. Lee G, Wang Z, Sehgal R, Chen CH, Kikuno K, Hay B, *et al.* Drosophila caspases involved in developmentally regulated programmed cell death of peptidergic neurons during early metamorphosis. *J Comp Neurol* 2011, **519**(1): 34-48.

13. Cha GH, Cho KS, Lee JH, Kim M, Kim E, Park J, *et al.* Discrete functions of TRAF1 and TRAF2 in *Drosophila melanogaster* mediated by c-Jun N-terminal kinase and NF-kappaB-dependent signaling pathways. *Molecular and cellular biology* 2003, **23**(22): 7982-7991.
14. Craig CR, Fink JL, Yagi Y, Ip YT, Cagan RL. A *Drosophila* p38 orthologue is required for environmental stress responses. *EMBO reports* 2004, **5**(11): 1058-1063.
15. Leiss D, Hinz U, Gasch A, Mertz R, Renkawitz-Pohl R. Beta 3 tubulin expression characterizes the differentiating mesodermal germ layer during *Drosophila* embryogenesis. *Development* 1988, **104**(4): 525-531.
16. Hedengren M, Asling B, Dushay MS, Ando I, Ekengren S, Wihlborg M, *et al.* Relish, a central factor in the control of humoral but not cellular immunity in *Drosophila*. *Molecular cell* 1999, **4**(5): 827-837.
17. Rutschmann S, Jung AC, Hetru C, Reichhart JM, Hoffmann JA, Ferrandon D. The Rel protein DIF mediates the antifungal but not the antibacterial host defense in *Drosophila*. *Immunity* 2000, **12**(5): 569-580.
18. Han C, Jan LY, Jan YN. Enhancer-driven membrane markers for analysis of nonautonomous mechanisms reveal neuron-glia interactions in *Drosophila*. *Proceedings of the National Academy of Sciences of the United States of America* 2011, **108**(23): 9673-9678.
19. Galko MJ, Krasnow MA. Cellular and genetic analysis of wound healing in *Drosophila* larvae. *PLoS biology* 2004, **2**(8): E239.
20. Lawrence PA, Bodmer R, Vincent JP. Segmental patterning of heart precursors in *Drosophila*. *Development* 1995, **121**(12): 4303-4308.
21. Ainsley JA, Pettus JM, Bosenko D, Gerstein CE, Zinkevich N, Anderson MG, *et al.* Enhanced locomotion caused by loss of the *Drosophila* DEG/ENaC protein Pickpocket1. *Curr Biol* 2003, **13**(17): 1557-1563.
22. Sinenko SA, Mathey-Prevot B. Increased expression of *Drosophila* tetraspanin, Tsp68C, suppresses the abnormal proliferation of ytr-deficient and Ras/Raf-activated hemocytes. *Oncogene* 2004, **23**(56): 9120-9128.
23. Lazareva AA, Roman G, Mattox W, Hardin PE, Dauwalder B. A role for the adult fat body in *Drosophila* male courtship behavior. *PLoS genetics* 2007, **3**(1): e16.

24. Narasimamurthy R, Geuking P, Ingold K, Willen L, Schneider P, Basler K. Structure-function analysis of Eiger, the *Drosophila* TNF homolog. *Cell research* 2009, **19**(3): 392-394.
25. Meier P, Silke J, Leervers SJ, Evan GI. The *Drosophila* caspase DRONC is regulated by DIAP1. *The EMBO journal* 2000, **19**(4): 598-611.
26. Lohmann I, McGinnis N, Bodmer M, McGinnis W. The *Drosophila* Hox gene deformed sculpts head morphology via direct regulation of the apoptosis activator reaper. *Cell* 2002, **110**(4): 457-466.
27. Chen P, Rodriguez A, Erskine R, Thach T, Abrams JM. Dredd, a novel effector of the apoptosis activators reaper, grim, and hid in *Drosophila*. *Developmental biology* 1998, **201**(2): 202-216.
28. Aplin AC, Kaufman TC. Homeotic transformation of legs to mouthparts by proboscipedia expression in *Drosophila* imaginal discs. *Mechanisms of development* 1997, **62**(1): 51-60.
29. Zhou L, Schnitzler A, Agapite J, Schwartz LM, Steller H, Nambu JR. Cooperative functions of the reaper and head involution defective genes in the programmed cell death of *Drosophila* central nervous system midline cells. *Proceedings of the National Academy of Sciences of the United States of America* 1997, **94**(10): 5131-5136.
30. Johnson RL, Milenkovic L, Scott MP. In vivo functions of the patched protein: requirement of the C terminus for target gene inactivation but not Hedgehog sequestration. *Molecular cell* 2000, **6**(2): 467-478.
31. Ignell R, Root CM, Birse RT, Wang JW, Nassel DR, Winther AM. Presynaptic peptidergic modulation of olfactory receptor neurons in *Drosophila*. *Proceedings of the National Academy of Sciences of the United States of America* 2009, **106**(31): 13070-13075.
32. Siegrist SE, Haque NS, Chen CH, Hay BA, Hariharan IK. Inactivation of both Foxo and reaper promotes long-term adult neurogenesis in *Drosophila*. *Curr Biol* 2010, **20**(7): 643-648.
33. Kanda H, Igaki T, Kanuka H, Yagi T, Miura M. Wengen, a member of the *Drosophila* tumor necrosis factor receptor superfamily, is required for Eiger signaling. *The Journal of biological chemistry* 2002, **277**(32): 28372-28375.
34. Dietzl G, Chen D, Schnorrer F, Su KC, Barinova Y, Fellner M, *et al.* A genome-wide transgenic RNAi library for conditional gene inactivation in *Drosophila*. *Nature* 2007, **448**(7150): 151-156.

35. Iyer EP, Iyer SC, Sulkowski MJ, Cox DN. Isolation and purification of Drosophila peripheral neurons by magnetic bead sorting. *Journal of visualized experiments : JoVE* 2009(34).
36. Bhattacharya S, Iyer EP, Iyer SC, Cox DN. Cell-type specific transcriptomic profiling to dissect mechanisms of differential dendritogenesis. *Genomics data* 2014, **2**: 378-381.
37. Iyer EP, Iyer SC, Sullivan L, Wang D, Meduri R, Graybeal LL, *et al.* Functional genomic analyses of two morphologically distinct classes of Drosophila sensory neurons: post-mitotic roles of transcription factors in dendritic patterning. *PLoS One* 2013, **8**(8): e72434.

Supporting Table 1. Genes upregulated upon sensory neuronal TNF/Eiger overexpression.

| CG number | Gene                                | Molecular Function    | Human ortholog           | Fold change | Sequence ID | Sequence code |
|-----------|-------------------------------------|-----------------------|--------------------------|-------------|-------------|---------------|
| CG31201   | Glutamate receptor IIE              | Ion channel           | GRIK2                    | 2.1630475   | 2499355     | A_09_P059281  |
| CG3772    | cryptochrome                        | GPCR signaling        | CRY1, CRY2               | 4.27233     | 2495248     | A_09_P091155  |
| CG1147    | Neuropeptide F receptor             | GPCR signaling        | NPY5R                    | 4.200895    | 2500094     | A_09_P036656  |
| CG33183   | Hormone receptor-like in 46         | Transcription         | RORB                     | 4.195125    | 2507060     | A_09_P144940  |
| CG18741   | Dopamine receptor 2                 | GPCR signaling        | ADRA1B, ADRA1D, HTR7     | 4.4514525   | 2504200     | A_09_P030561  |
| CG33344   | Cardioacceleratory peptide receptor | GPCR signaling        | NPSR1                    | 2.2945625   | 2484477     | A_09_P047356  |
| CG34381   | Trissin receptor                    | GPCR signaling        | GPR139, GPR19, NPBWR1    | 3.1337875   | 2495952     | A_09_P216970  |
| CG31760   |                                     | GPCR signaling        | GPR179                   | 2.1514775   | 2487965     | A_09_P013641  |
| CG7431    | Tyramine receptor                   | GPCR signaling        | ADRA1D, HRH1, HRH2, HTR4 | 3.85525     | 2488554     | A_09_P214165  |
| CG10888   | Rhodopsin 3                         | GPCR signaling        | OPN4                     | 2.826415    | 2507755     | A_09_P044391  |
| CG33513   | NMDA receptor 2                     | Ion channel           | GRIN2D                   | 2.1088125   | 2507487     | A_09_P047611  |
| CG7383    | eagle                               | Transcription         | VDR                      | 1.895905    | 2492609     | A_09_P135120  |
| CG9918    | Pyrokinin 1 receptor                | GPCR signaling        | NMUR1, NMUR2             | 2.5064225   | 2512044     | A_09_P074941  |
| CG15744   |                                     | GPCR signaling        | ADGRA2                   | 2.6660225   | 2496091     | A_09_P038331  |
| CG6899    | Protein tyrosine phosphatase 4E     | Phosphatase, receptor | PTPRB                    | 1.87305     | 2498522     | A_09_P170990  |
| CG2872    | Allatostatin Receptor               | GPCR signaling        | GALR2                    | 2.910375    | 2514720     | A_09_P066211  |
| CG4007    | Neurospecific receptor kinase       | Enzymatic activity    | MUSK                     | 2.0737025   | 2516306     | A_09_P032321  |
| CG11783   | Hormone receptor-like in 96         | Transcription         | NR112                    | 3.283885    | 2488919     | A_09_P030601  |
| CG34384   |                                     | Enzymatic activity    | DGKH                     | 4.6278075   | 2496126     | A_09_P147935  |
| CG11111   | retinal degeneration B              | Enzymatic activity    | PITPNM2                  | 3.2450125   | 2508957     | A_09_P051071  |
| CG2171    | Triose phosphate isomerase          | Enzymatic activity    | TPI1                     | 2.66855     | 2489405     | A_09_P146560  |
| CG6502    | Enhancer of zeste                   | Enzymatic activity    | EZH2                     | 2.6339075   | 2491045     | A_09_P042316  |
| CG10986   | garnet                              | Protein transport     | AP3D1                    | 3.28213     | 2493939     | A_09_P104225  |
| CG4747    |                                     | Enzymatic activity    | GLYR1                    | 4.1603975   | 2511026     | A_09_P204720  |
| CG2155    | vermillion                          | Enzymatic activity    | TDO2                     | 2.4186625   | 2514857     | A_09_P009976  |
| CG12529   | Zwischenferment                     | Enzymatic activity    | G6PD                     | 1.9283325   | 2511576     | A_09_P010116  |
| CG6728    | ninaG                               | Enzymatic activity    | CHDH                     | 3.8052075   | 2496597     | A_09_P073811  |

Supporting Table 2. Comparison between instrument settings and measured- UV doses.

| Set in UV crosslinker | Measured in UV radiometer |
|-----------------------|---------------------------|
| 5 mJ/cm <sup>2</sup>  | 2-3 mJ/cm <sup>2</sup>    |
| 8 mJ/cm <sup>2</sup>  | 4-5 mJ/cm <sup>2</sup>    |
| 12 mJ/cm <sup>2</sup> | 6-7 mJ/cm <sup>2</sup>    |
| 17 mJ/cm <sup>2</sup> | 8-10 mJ/cm <sup>2</sup>   |
| 20 mJ/cm <sup>2</sup> | 11-14 mJ/cm <sup>2</sup>  |

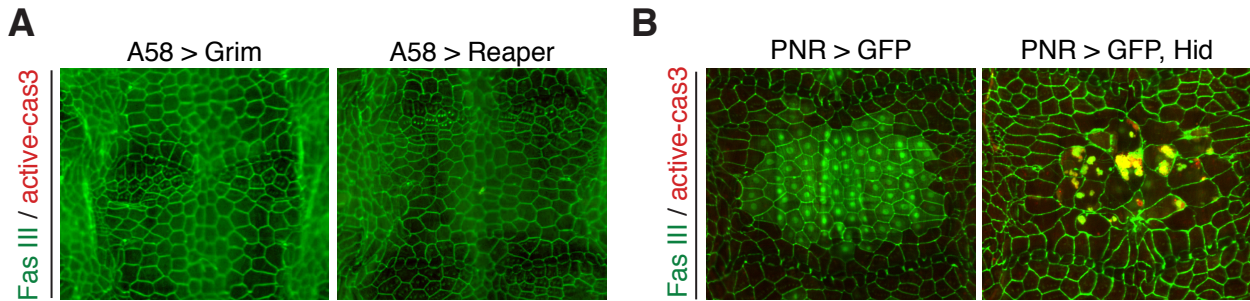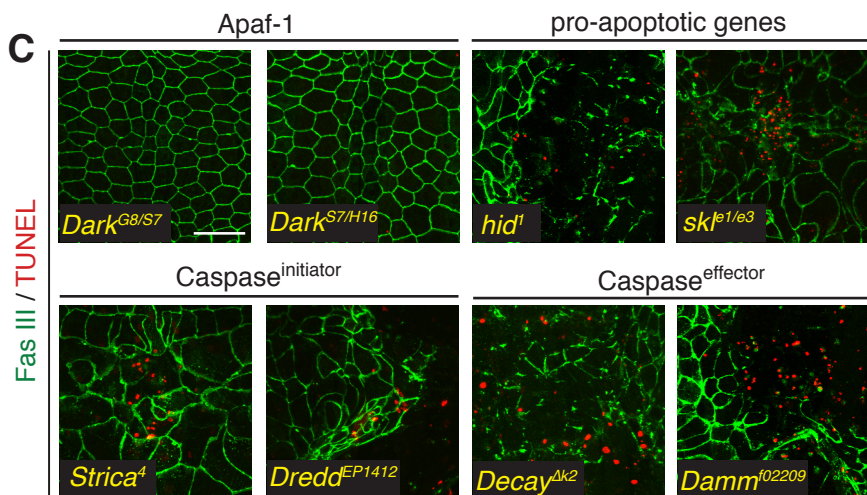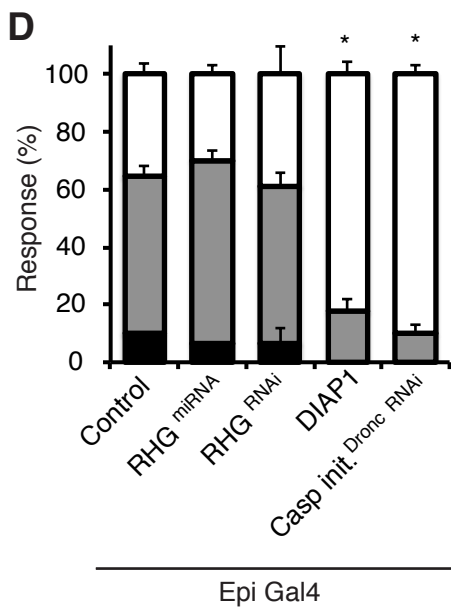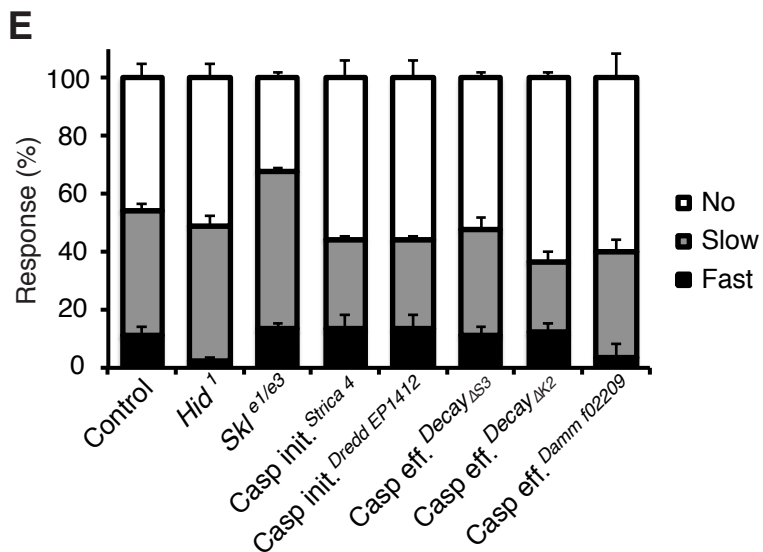

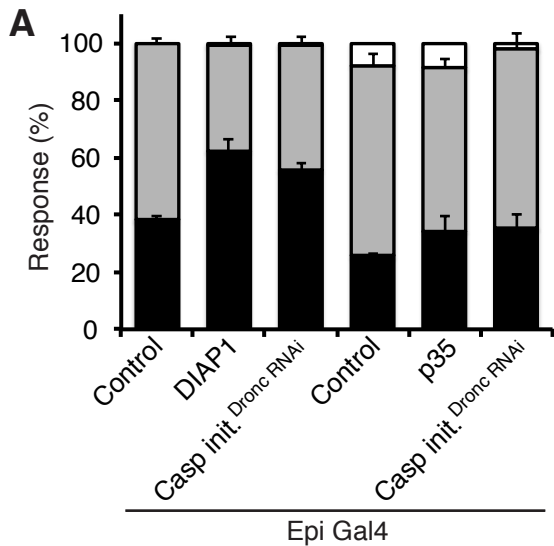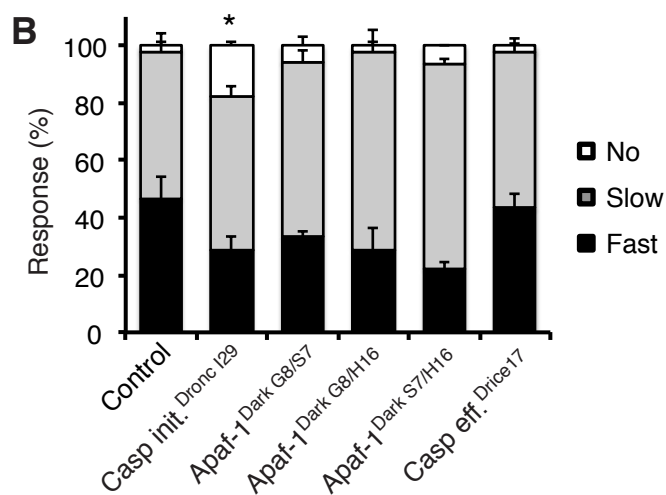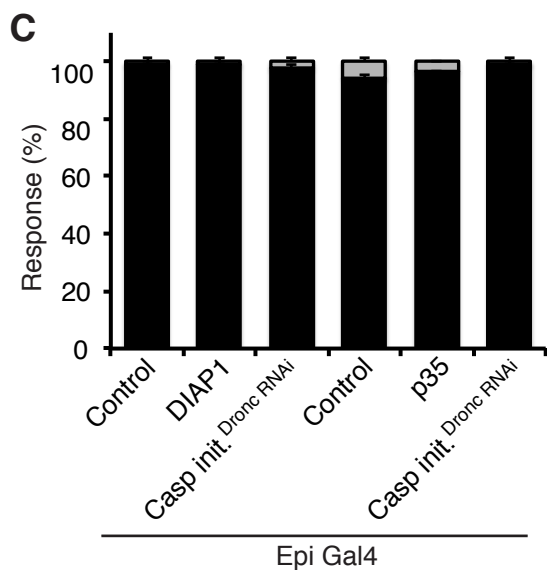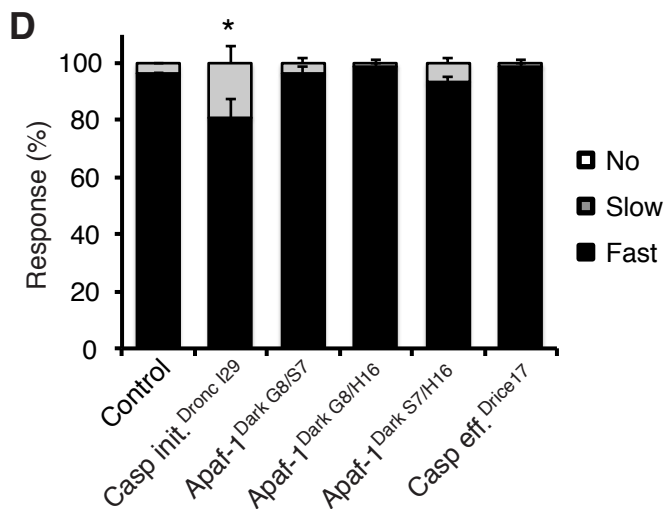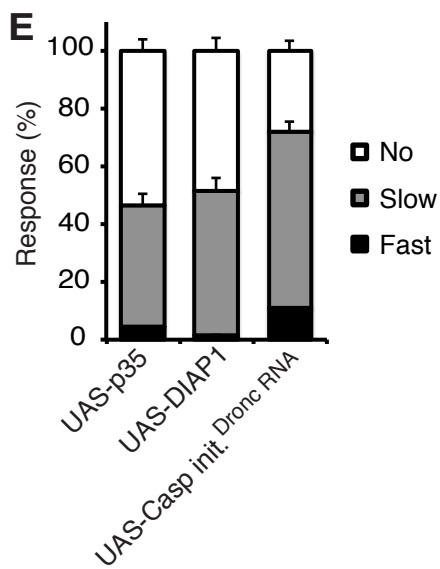



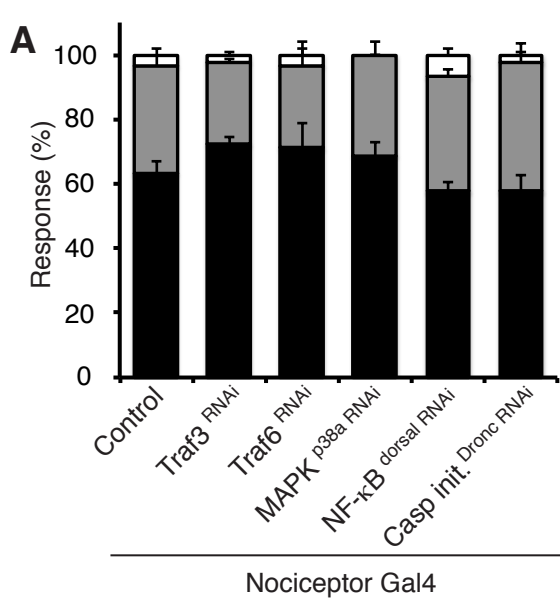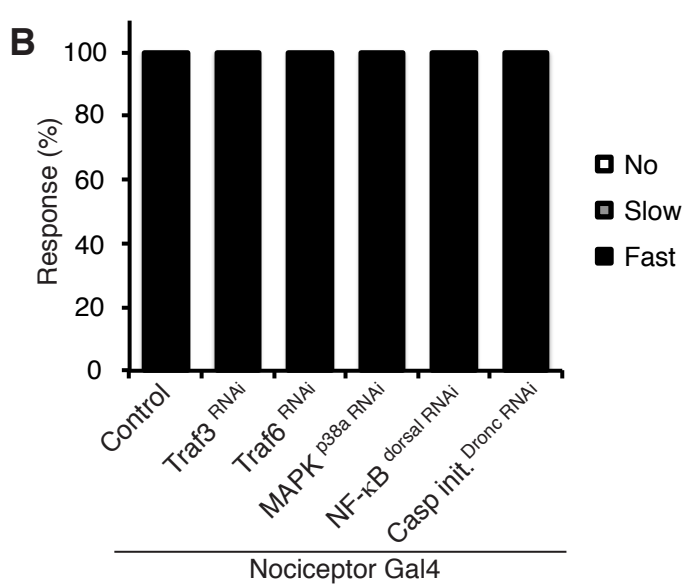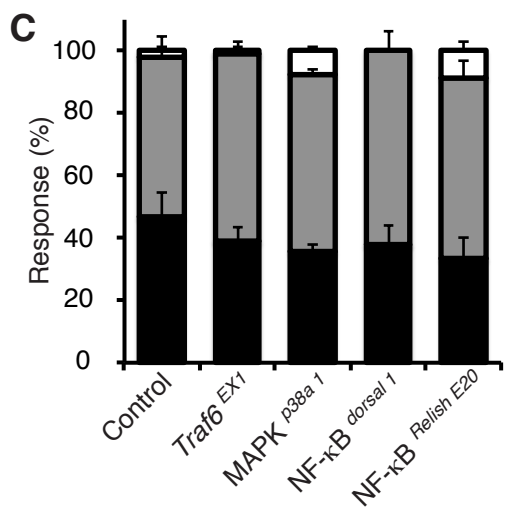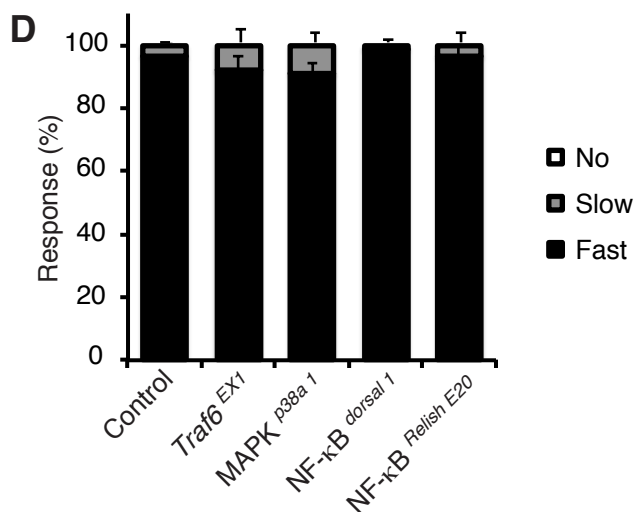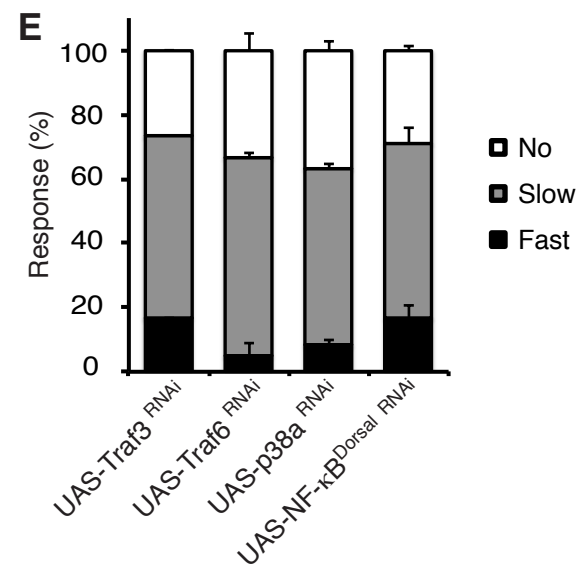

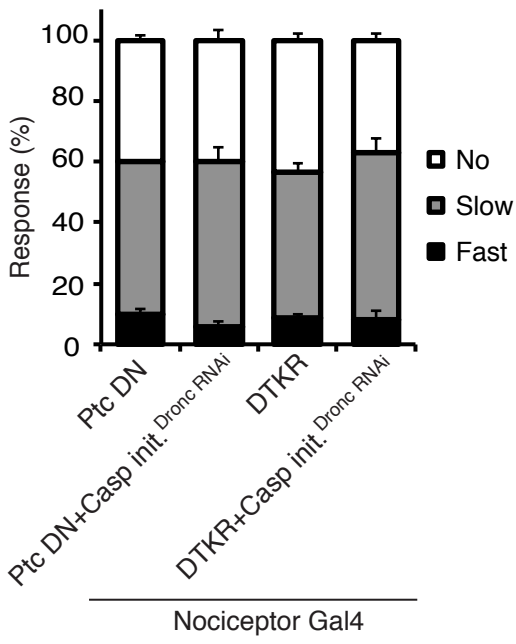

**A**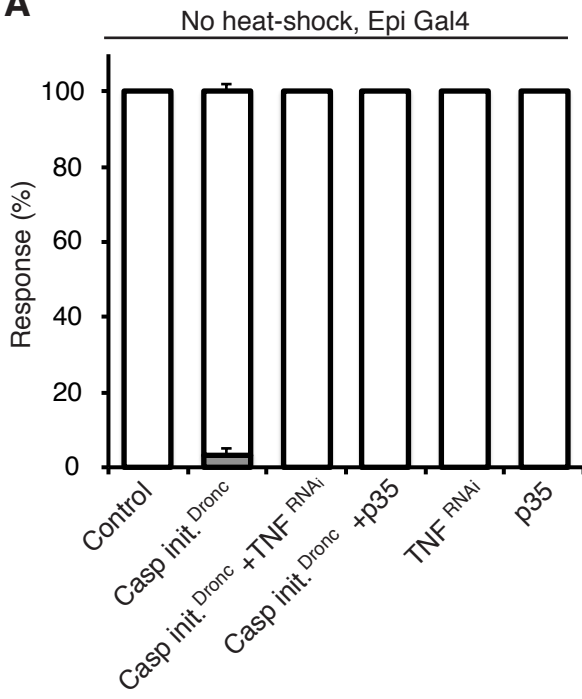**B**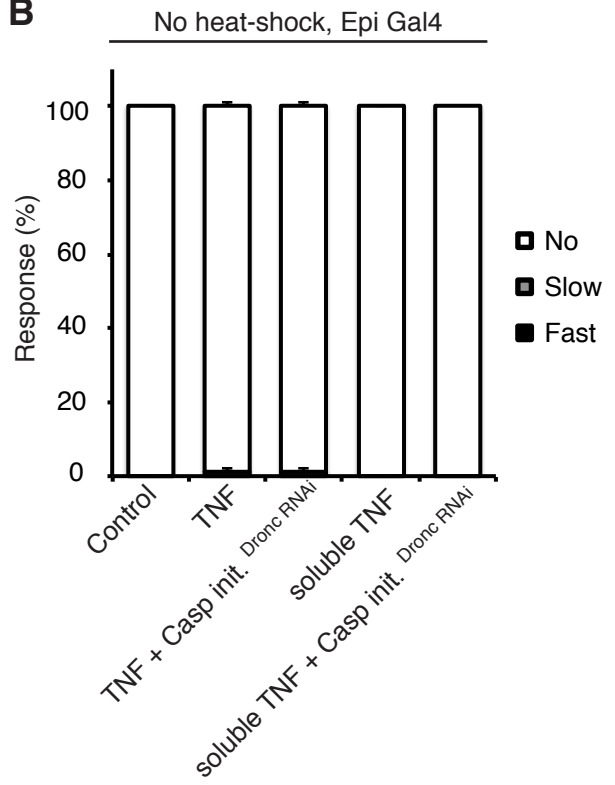

A

Hours post UV irradiation

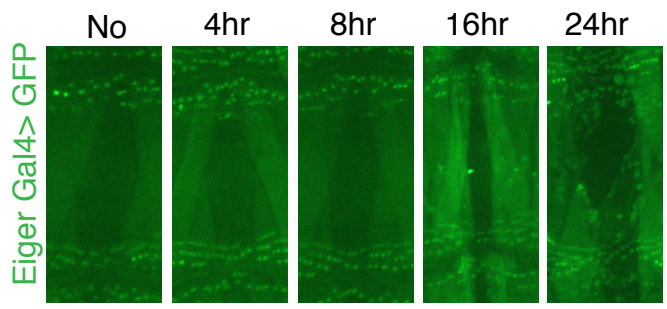

**A**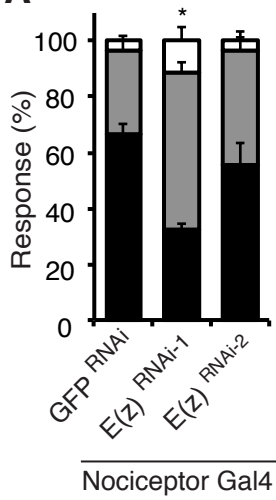**B**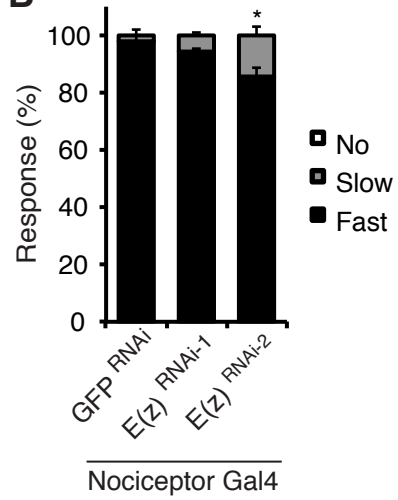**C**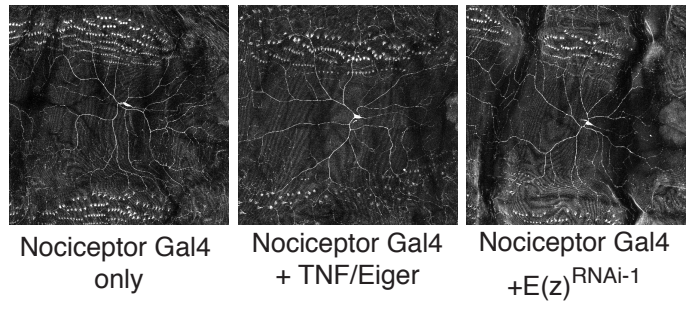

Supplement: cddis2016474x1.pdf [file cddis2016474x1.pdf]
